# Supplementary material for: The effect of rainfall amount and timing on annual transpiration in a grazed savanna grassland
Source: Copernicus journal article supplement (doi:10.5194/hess-2021-292), 2021-08-09
Supplement: Supplementary file [file hess-2021-292-AC1-supplement.pdf]

## Response to Russell Scott (Referee #1)

In this paper, the authors examine the transpiration of a grazed savanna in Africa to determine what are the controls on annual ET partitioning. They do this by using 6 yrs of eddy covariance data and three different partitioning techniques. They conclude that early season rainfall timing strongly controlled annual T/ET by affecting the growing season dynamics primarily of grasses rather than the trees.

I found this study very interesting and generally, sound. I think it will be potentially of great interest to the readers of this journal. However, I found the presentation of the results confusing at times and would recommend a thorough restructuring of them. Many of the authors' conclusions are conjectures about the grass functioning with little to back them (i.e., you've got T and ET but not T<sub>grass</sub> and T<sub>tree</sub>).

We thank Dr. Russel Scott for all the helpful comments and suggestions. Thanks to your suggestions we have considerably revised the manuscript results and presentation. As detailed below, the main changes we propose are:

- i) including estimates of daily grass transpiration based on the soil moisture profile measurements available for the last four years using the RWU method (Jackisch et al., 2020).
- ii) evaluating the dry season ET partitioning results from all the partitioning methods based on the stage-2 soil evaporation theory (Hu and Lei, 2021)
- iii) restructuring the results to the following sections: Site meteorology and ET partitioning, monthly T and T/ET, and interannual variation.

Here are a few suggestions and comments that hopefully may guide a restructuring of the paper:

1. The paper needs a deeper look into the controls on the total T and T/ET. Ultimately, this has got to be about water availability, right? Rain event frequency is really an indirect way of looking at it. It says nothing about the total amount of water and where it is located (shallow or deep). Certainly, storm depth must be a critical factor in how frequency is translated into water availability. Since you've got the data to do it (E, T, GPP, LAI, soil moisture) can you better unpack the seasonal pattern, showing in greater detail how summed T and E and soil moisture evolve through the early to middle part of a growing season contrasting a normal year with a dry one? You could look at the monthly level data, but you should be able to do this on a daily scale for the TEA or Berkelhammer results if you wanted to show the finer dynamics. Also, what about the E dynamics? Does storm frequency have an influence in the amount of E?

Thank you for this suggestion. We have estimated the daily grass transpiration based on the soil moisture profile measurements available for the last four years (Jackisch et al., 2020). For the wet years 2012 and 2013, the deep soil layer (60cm) gets wet and the estimated grass transpiration is over 200 mm/year. In 2014, the deeper soil layer stays dry and grass transpiration is reduced while total transpiration is similar to the wet years. In the drought year, the grass transpiration is decreasing while the total transpiration is increasing during the middle of the wet season, suggesting higher relative contribution of tree transpiration. We will add a new figure showing the soil evaporation dynamics by

presenting the stage-2 soil evaporation analysis of the last precipitation event of each year for all methods used. The cumulative daily soil evaporation is regressed against  $\text{day}^{(0.5)}$ . Linear scaling is expected and the derived soil desorption values can be compared to published values. The soil desorption values, representing the soil evaporation after rainfall events, are linearly correlated with the initial air temperature for the Berkelhammer and uWUE method. This relation has also been observed in laboratory conditions (Ben Neria et al., 2014).

2. There are lots of inferences about grass and tree functioning, but little data about this is shown in the results. Is there a way you can use the remote sensing and the monthly data to make your case more strong? E.g., you write that there aren't many LAI changes for the trees so LAI is really indicative of the grass LAI. You're also saying that the C4 grasses control their water use by dying back or growing new leaves. If so, is there a way to use T/ET (or maybe better, just T) and LAI to show this more clearly?

We will present the monthly time series of  $T_{\text{grass}}$  and T for all methods. Also, we will show in the fig. 6 the monthly T/ET, T and  $T_{\text{grass}}$  as a function of MODIS LAI. The  $T_{\text{grass}}$  scales linearly with increasing LAI during the wet years 2012 and 2013. However, during the drought year, monthly  $T_{\text{grass}}$  is limited to 15 mm/month for a range of LAI values, showing that the T is increasing together with an increase in tree LAI. The new results show that tree transpiration can vary among years and variation in wet season LAI may reflect those of the both grass and tree fractions. We will update the manuscript according to these new results.

3. The introduction is underdeveloped. What is missing are the previous results that lead to expectations of what you might find here. There are quite a few studies cited for semi-arid systems but what have you learned from them that help guide this analysis?

Thank you for this comment. We will update this section with field results from similar sites to better explain what we expect to find. At the least, we will include (1) the study by Swemmer et al. (2007) showing how number of precipitation events and their distribution are better predictors of above-ground productivity than total rainfall, and (2) the remote sensing analysis showing a positive relationship with grass cover and rainfall frequency (D'Onofrio et al., 2019).

Text specific suggestions and questions:

Title: Is it a savanna or grassland or both?

It's both. A grassland with typical savanna grass and tree species.

P1.

L 27-29. Is there data to support these claims about grass and tree functioning?

We will modify these statements according to the new analysis of the results.

L30. What is an anomalous monthly T/ET relation?

This referred to the Fig.6d pattern. We will remove this sentence.

L31. How can drought be reasonably described by P timing alone? Storm depth has got to play a role as it ultimately is about water availability and its timing.

We will revise this sentence. The intention was not to say that the drought is described by the P timing alone. The drought year is characterized by 11 months of infrequent rainfall. The interesting result is that the annual T and T/ET based on both Berkelhammer and uWUE method estimated T are best explained by the early season rainfall.

P.2

L12. You might also consider this paper which also talks about monthly T/ET dynamics in semiarid systems: Scott, R. L., & Biederman, J. A. (2017). *Geophysical Research Letters*, 44(13), 6833-6840.

Thank you. We will include it in the revision.

L23. Maybe say "partially decoupling" as 37% isn't huge.

Corrected.

P.3

L5. These papers that compared approaches could be cited here: Berkelhammer et al. 2016, Scott et al. 2021, Nelson et al. 2020. *Global change biology*, 26(12), 6916-6930.

We will include these references.

L11-L13. I don't understand how using both LAI and EVI allowed you to quantify the dynamics of the grasses and trees.

We will change this sentence. The early season EVI can be used estimate the tree green-up dates but during the wet season LAI and EVI are composite of grass and tree leaf area. The LAI, T and  $T_{\text{grass}}$  enable better to quantify the dynamics of grasses and trees.

L19. "farm" or "ranch"?

Changed to ranch.

P.5

L20. “verified” or “computed”? Verified with what?

Computed

P.6

L10. averaged over what time period?

Daytime data for the whole six-year period.

P.9

L11. You need to sum 1/2 hr T's and ET separately and then take their ratio. You can't just take the average T/ET.

Thank you for this correction. We have now calculated the daily mean T/ET using each method and then used this daily T/ET according to your suggestion. For example, monthly T is sum of daily values of T. We do this on daily scale because the half-hour T/ET series from Berkelhammer and uWUE methods are discontinuous.

L25. I'm wondering why this was done across all years. I would think that the same reasons that you fit the Berkelhammer approach yearly should apply equally here. Yearly changes in ecosystem structure/lai should warrant a yearly fit.

We were following the uWUE method as it has been reported in the previous publications. However, to facilitate better comparison to the Berkelhammer method, we have now calculated the uWUE method also using the yearly fit.

L27. “...of each month.” This is confusing. I thought uWUEp was computed for the 6 yrs and uWUEa was computed monthly?

This is a mistake. We will revise this. We have now computed uWUEp for each year.

P10.

Table 1. As you've already described the methods in the text. This table is superfluous. Suggest omitting.

This Table was suggested by the reviewer of the earlier version of this manuscript. We prefer to keep it for a general reader.

<https://hess.copernicus.org/preprints/hess-2019-651/>

L14-16. Was there a reason for using both EVI and LAI? I've always found the essentially the same information content in each signal. For simplicity in the presentation of the results, you might consider using only LAI.

The signals are slightly different and the green-up detection is sensitive to those changes. Because the EVI is the preferred product to be used for green-up detection, we kept both products (Adole et al, 2018).

Table 2. For the T and E columns. What method is this or is this an average between the three? Also, see Fig. 5b...no method given.

It's the Berkelhammer method. We will specify each T in the revised manuscript. We will show  $T_{\text{grass}}$  and T from each method in the Fig. 5.

P16.

L7-9. This is a possibility but isn't it also possible that T/ET in the late rainy season goes up as the soil dries and E becomes negligible?

We have compared the estimated E from each model during this period using the stage-2 soil evaporation theory. After a precipitation event at the end of May, the soil is dry for stage-2 conditions. The soil desorption is the slope of the cumulative daily soil evaporation and  $\text{day}^{(0.5)}$ . This relation is expected to be linear. The soil desorption values are 2.91, 1.92 and 1.08  $\text{mm}/\text{day}^{(0.5)}$  for the Berkelhammer, uWUE and TEA methods. The expected range for the soil desorption is from 3 to 6  $\text{mm}/\text{day}^{(0.5)}$  for sandy soils (Brutsaert and Chen, 1995; Hu and Lei, 2021). This suggests that the Berkelhammer method produced the most plausible soil evaporation, but we will analyze this further by also looking at the LAI changes over this period.

L16. "due to a higher early-season precipitation frequency". Sorry to beleaguer the point, but the higher frequency may be a symptom rather than the cause of higher water availability.

We will omit the Fig.6c-d and focus the analysis on the  $T_{\text{grass}}$  and T for all methods. The comparison was shown here because it was known that the early season P frequency is the best predictor of annual T and T/ET.

L29. It gets awkward to use the inverse. Why not present the usual WUE metric instead, making these numbers readily comparable to previous studies?

We will change these to the usual WUE units.

P18.

L2-3. As this section jumps back into the site water balance shown in 3.1, I found it confusing. You might change the organization of the results to one being about the water balance (talking P, ET, T, interception, Esoil, deltaS etc. and their variability) and the other being ET partitioning. Also, maybe adding a section that talks about the grass/tree dynamics separately to better support your claims.

This is a good suggestion. We will restructure the results by first showing the daily time series and ET partitioning results. Then the monthly T, T/ET and  $T_{\text{grass}}$  for all methods, showing differences among method and distinguishing between tree and grass dynamics. The water balance and interannual variation is presented in the final section.

L11. See comment L16 above.

We failed to put this result to context in the discussion. The early season P frequency is the best predictor of annual T and T/ET. If we exclude the drought year, then it's the only significant predictor. It reflects the fact that temporal distribution of P affects the productivity (Swemmer et al. 2007). This result is interesting from the ecohydrological modeling perspective because at the Kalahari precipitation gradient (P = 300 to 950 mm/year) the mean storm depth is practically constant (9.5 to 10.3 mm/day) and only the precipitation frequency increases along the gradient (Porporato et al., 2003).

P19.

L10-13. In this summary of the results where is the evidence for this? I think this paper would really be improved if you could organize your results to better show this.

As stated above we have now estimated the grass transpiration and we are able to better show the grass and tree dynamics.

L22, Not clear what this sentence is here to address. On the surface, it says rainfall frequency is not important.

We will revise this part of the discussion.

L25. Where is this dieback - regrowth shown? Can you use EVI or LAI to show this?

It is shown in the Fig. 2e. Two local maximums in the EVI during the drought year. This kind of seasonality is not seen during any other year since 2001 for the EVI.

P21.

L5. I would delete this comparison. Using a BR from a higher annual PPT site isn't appropriate. Also, in order to use the BR to estimate ET you need to rely on H which may or may not be subject to commensurate errors.

We will delete this comparison.

L4-18. I'd suggest also considering, Scott, R. L., & Biederman, J. A. (2019). *Water Resources Research*, 55(1), 574-588 here. To me, the fact that  $ET \sim P$  is really solid evidence for the validity of your ET measurements so long as runoff (surface or deep) is negligible. Having an  $ET = P$  seems quite appropriate especially if you have those deep-rooted trees to capture any deeper infiltration.

Thanks. We will consider this comparison. Indeed, the decline in grass transpiration during the wet year 2014 seems to be compensated by the tree transpiration.

P22.

L 9-16. The Scott and Biederman 2017 paper using an entirely different method suggests a peak of  $T/ET \sim 0.60 - 0.70$  for a drier savanna site, similar to the results you have here.

We will include this reference.

L20. This is a discussion point, not a conclusion that comes from this paper.

We will change this statement.

## References

Adole, T., Dash, J., and Atkinson, P. M.: Large-scale prerain vegetation green-up across Africa, 24, 4054–4068, <https://doi.org/10.1111/gcb.14310>, 2018.

Ben Neriah, A., Assouline, S., Shavit, U., and Weisbrod, N.: Impact of ambient conditions on evaporation from porous media, *Water Resour. Res.*, 50, 6696–6712, <https://doi.org/10.1002/2014WR015523>, 2014.

Brutsaert, W. and Chen, D.: Desorption and the two Stages of Drying of Natural Tallgrass Prairie, 31, 1305–1313, <https://doi.org/10.1029/95WR00323>, 1995.

D'Onofrio, D., Sweeney, L., von Hardenberg, J., and Baudena, M.: Grass and tree cover responses to intra-seasonal rainfall variability vary along a rainfall gradient in African tropical grassy biomes, *Sci Rep*, 9, 2334, <https://doi.org/10.1038/s41598-019-38933-9>, 2019.

Jackisch, C., Knoblauch, S., Blume, T., Zehe, E., and Hassler, S. K.: Estimates of tree root water uptake from soil moisture profile dynamics, 17, 5787–5808, <https://doi.org/10.5194/bg-17-5787-2020>, 2020.

Hu, X. and Lei, H.: Evapotranspiration partitioning and its interannual variability over a winter wheat-summer maize rotation system in the North China Plain, *Agricultural and Forest Meteorology*, 310, 108635, <https://doi.org/10.1016/j.agrformet.2021.108635>, 2021.

Porporato, A., Laio, F., Ridolfi, L., Caylor, K. K., and Rodriguez-Iturbe, I.: Soil moisture and plant stress dynamics along the Kalahari precipitation gradient, 108, <https://doi.org/10.1029/2002JD002448>, 2003.

Swemmer, A. M., Knapp, A. K., and Snyman, H. A.: Intra-seasonal precipitation patterns and above-ground productivity in three perennial grasslands, 95, 780–788, <https://doi.org/10.1111/j.1365-2745.2007.01237.x>, 2007.
